# Supplementary material
Source: PubMed Central journal article supplement (PMC8314619)
Supplement: jcsm.9184.ds001.pdf [file jcsm.9184.ds001.pdf]

Table S1 Search Strategy (Medline Ovid)

|           |                                                              |              |
|-----------|--------------------------------------------------------------|--------------|
| <b>1</b>  | <b>Sleep Apnoea Syndromes/ or Sleep Apnoea, Obstructive/</b> | <b>30535</b> |
| <b>2</b>  | Mandibular Advancement/                                      | 1736         |
| <b>3</b>  | Patient Compliance/                                          | 54886        |
| <b>4</b>  | Obstructive sleep apnoea.mp                                  | 3798         |
| <b>5</b>  | OSA.mp.                                                      | 10389        |
| <b>6</b>  | Oral Appliance.mp.                                           | 486          |
| <b>7</b>  | Mandibular advancement appliance.mp.                         | 0            |
| <b>8</b>  | Patient adherence.mp.                                        | 2838         |
| <b>9</b>  | Patient compliance.mp.                                       | 2838         |
| <b>10</b> | 1 or 4 or 5                                                  | 34644        |
| <b>11</b> | 2 or 6                                                       | 2098         |
| <b>12</b> | 3 or 8 or 9                                                  | 63355        |
| <b>13</b> | 10 and 11 and 12                                             | 99           |

Table S2 Excluded Studies along with the reason for exclusion

| <b>Sr. no.</b> | <b>Study</b>            | <b>Reason for Exclusion</b>                                                                       |
|----------------|-------------------------|---------------------------------------------------------------------------------------------------|
| 1              | Bachour et al, 2016     | Excluded (Wrong outcome –no information in regard to influence of variables on patient adherence) |
| 2              | Banhiran et al, 2014    | Excluded (Wrong outcome –no information in regard to influence of variables on patient adherence) |
| 3              | Basoglu et al, 2012     | Excluded (Wrong outcome –no information in regard to influence of variables on patient adherence) |
| 4              | Bennett et al, 1998     | Excluded (Wrong comparator- CPAP vs OA)                                                           |
| 5              | Ferguson et al, 1996    | Excluded (Wrong comparator- CPAP vs OA)                                                           |
| 6              | Freidman et al, 2010    | Excluded (Wrong outcome –no information in regard to influence of variables on patient adherence) |
| 7              | Gagnadoux et al, 2009   | Excluded (wrong comparator –CPAP vs OA)                                                           |
| 8              | Gindre et al, 2008      | Excluded (wrong outcome –no information in regard to influence of variables on patient adherence) |
| 9              | Neill et al, 2002       | Excluded (Wrong outcome –no information in regard to influence of variables on patient adherence) |
| 10             | Peled et al, 2009       | Excluded (Wrong outcome –no information in regard to influence of variables on patient adherence) |
| 11             | Randerath et al, 2002   | Excluded (Wrong comparator –CPAP vs OA)                                                           |
| 12             | Tavares et al, 2009     | Excluded- Full Text Not available                                                                 |
| 13             | Tsai et al, 2004        | Excluded (Wrong outcome –no information in regard to influence of variables on patient adherence) |
| 14             | Vanderveken et al, 2012 | Excluded (Wrong study design)                                                                     |

Table S3. Categorisation of the studies based on the influencing factor

| Sr no.                  | Exposure of interest                                  | Study                        |
|-------------------------|-------------------------------------------------------|------------------------------|
| 1                       | <b>Disease and Patient Characteristics</b>            | De Almeida et al, 2005       |
|                         |                                                       | Dieltjens et al, 2013        |
|                         |                                                       | Ghazal et al, 2009           |
|                         |                                                       | Izci et al, 2005             |
|                         |                                                       | McGown et al, 2001           |
|                         |                                                       | Brette et al, 2012           |
|                         |                                                       | Dieltjens et al, 2015        |
|                         |                                                       | Ingman et al, 2013           |
|                         |                                                       | Nerfeldt et al, 2016         |
|                         |                                                       | Prescinotto et al, 2015      |
|                         |                                                       | Rose et al, 2002             |
|                         |                                                       | Saglam-Aydinatay et al, 2018 |
|                         |                                                       | Tsuda et al, 2010            |
| 3                       | <b>Appliance Fabrication and Titration Procedures</b> | Gagnadoux et al, 2017        |
|                         |                                                       | Johal et al, 2017            |
|                         |                                                       | Lee at al, 2013              |
|                         |                                                       | Wang et al, 2014             |
|                         |                                                       | Zhou et al, 2012             |
|                         |                                                       | Al-Dharrab et al, 2017       |
|                         |                                                       | Dieltjens et al, 2013        |
|                         |                                                       | Ghazal et al, 2009           |
|                         |                                                       | Quinnell et al, 2014         |
|                         |                                                       | Freidman et al, 2012         |
|                         |                                                       | Vanderveken et al, 2008      |
| 4                       | <b>Side Effects</b>                                   | Attali et al, 2016           |
|                         |                                                       | De Almeida et al, 2005       |
|                         |                                                       | Izci et al, 2005             |
|                         |                                                       | Makihara et al, 2016         |
|                         |                                                       | McGown et al, 2001           |
|                         |                                                       | Bates et al, 2006            |
|                         |                                                       | Clark et al, 2000            |
|                         |                                                       | Freidman et al, 2012         |
|                         |                                                       | Dieltjens et al, 2015        |
|                         |                                                       | Haviv et al, 2017            |
|                         |                                                       | Nishigawa et al, 2017        |
|                         |                                                       | Rose et al, 2002             |
|                         |                                                       | Tsuda et al, 2010            |
| Vecchierini et al, 2016 |                                                       |                              |
| 4                       | <b>Psychological &amp; Social Factors</b>             | Attali et al, 2016           |
|                         |                                                       | Carballo et al, 2016         |
|                         |                                                       | De Almeida et al, 2005       |
|                         |                                                       | Dieltjens et al, 2013        |
|                         |                                                       | Izci et al, 2005             |

|  |  |                              |
|--|--|------------------------------|
|  |  | Makihara et al, 2016         |
|  |  | McGown et al, 2001           |
|  |  | Brette et al, 2012           |
|  |  | Haviv et al, 2017            |
|  |  | Nishigawa et al, 2017        |
|  |  | Rose et al, 2002             |
|  |  | Saglam-Aydinatay et al, 2018 |

Table S4. Risk of bias assessment for RCTs using Cochrane Risk of Bias Tool

| <b>1</b>   | <b>Al Dharrab 2017</b>                          | <b>Risk of Bias</b> | <b>Support for judgement</b>                                                                                                                                                                                                                      |
|------------|-------------------------------------------------|---------------------|---------------------------------------------------------------------------------------------------------------------------------------------------------------------------------------------------------------------------------------------------|
| <b>i</b>   | Randomisation (Selection Bias)                  | Low risk            | "The patients were then simply randomised to treatment with either Type A or Type B appliance."                                                                                                                                                   |
| <b>ii</b>  | Allocation Concealment (Selection Bias)         | Unclear risk        | No clear description                                                                                                                                                                                                                              |
| <b>iii</b> | Blinding of outcome assessment (Detection Bias) | Unclear risk        | No clear description                                                                                                                                                                                                                              |
| <b>iv</b>  | Incomplete Outcome Data (Attrition Bias)        | Low risk            | "No patients were dropped from the study for any reason."                                                                                                                                                                                         |
| <b>v</b>   | Selective Reporting                             | Low risk            | The authors reported all the pre-specified outcomes.                                                                                                                                                                                              |
| <b>2</b>   | <b>Cunali 2011</b>                              | <b>Risk of Bias</b> | <b>Support for judgement</b>                                                                                                                                                                                                                      |
| <b>i</b>   | Randomisation (Selection Bias)                  | Low risk            | "...study was a double-blind, Randomised, and controlled trial in which patients were distributed..."                                                                                                                                             |
| <b>ii</b>  | Allocation Concealment (Selection Bias)         | Low risk            | "The investigator who was blinded to the Randomisation has only applied all study instruments of evaluation such as the RDC, while a second investigator did the Randomisation and was responsible for explaining the exercises to the patients." |
| <b>iii</b> | Blinding of outcome assessment (Detection Bias) | Unclear risk        | No clear description                                                                                                                                                                                                                              |
| <b>iv</b>  | Incomplete Outcome Data (Attrition Bias)        | Low risk            | Small number of dropouts in both of the groups ( Support therapy n=1 dropout vs Placebo Therapy n=2 dropout)                                                                                                                                      |
| <b>v</b>   | Selective Reporting                             | Low risk            | The authors reported all the pre-specified outcomes.                                                                                                                                                                                              |
| <b>3</b>   | <b>Gagnadoux 2017</b>                           | <b>Risk of Bias</b> | <b>Support for judgement</b>                                                                                                                                                                                                                      |
| <b>i</b>   | Randomisation (Selection Bias)                  | High risk           | "This prospective non Randomised study was conducted..."                                                                                                                                                                                          |
| <b>ii</b>  | Allocation Concealment (Selection Bias)         | High risk           | Lack of Randomisation and allocation concealment                                                                                                                                                                                                  |

|            |                                                 |              |                                                                                                                                                                                                                              |
|------------|-------------------------------------------------|--------------|------------------------------------------------------------------------------------------------------------------------------------------------------------------------------------------------------------------------------|
| <b>iii</b> | Blinding of outcome assessment (Detection Bias) | Low risk     | "Outcome assessors were unaware of the device assignment."                                                                                                                                                                   |
| <b>iv</b>  | Incomplete Outcome Data (Attrition Bias)        | High risk    | Large number of dropouts in both groups (Ready-made n=39 dropouts and Custom-made n= 23 dropouts) and imbalanced Randomisation (Ready-made n= 125 vs Custom-made n=95) due to lack of Randomisation.                         |
| <b>v</b>   | Selective Reporting                             | Low risk     | The authors reported all the pre-specified outcomes.                                                                                                                                                                         |
| <b>4</b>   | Lee 2013                                        | Risk of Bias | Support for judgement                                                                                                                                                                                                        |
| <b>i</b>   | Randomisation (Selection Bias)                  | High risk    | No description of Randomisation and allocation concealment. "Two groups of patients were included in the present study; one group of patients was prescribed mono-bloc MAD and the other group of patients was bi-bloc MAD." |
| <b>ii</b>  | Allocation Concealment (Selection Bias)         | High risk    | No description of allocation concealment. "Two groups of patients were included in the present study; one group of patients was prescribed mono-bloc MAD and the other group of patients was bi-bloc MAD."                   |
| <b>iii</b> | Blinding of outcome assessment (Detection Bias) | Unclear risk | No clear description                                                                                                                                                                                                         |
| <b>iv</b>  | Incomplete Outcome Data (Attrition Bias)        | Low risk     | No dropouts or withdrawal as 153 patients were enrolled and 153 were analysed                                                                                                                                                |
| <b>v</b>   | Selective Reporting                             | Low risk     | The authors reported all the pre-specified outcomes.                                                                                                                                                                         |
| <b>5</b>   | Quinnell 2014                                   | Risk of Bias | Support for judgement                                                                                                                                                                                                        |
| <b>i</b>   | Randomisation (Selection Bias)                  | Low risk     | "This open-label, randomised, controlled, crossover trial was undertaken at a UK sleep centre."                                                                                                                              |
| <b>ii</b>  | Allocation Concealment (Selection Bias)         | Unclear risk | No clear description                                                                                                                                                                                                         |
| <b>iii</b> | Blinding of outcome assessment (Detection Bias) | Unclear risk | No clear description                                                                                                                                                                                                         |

|            |                                                 |              |                                                                                                                                          |
|------------|-------------------------------------------------|--------------|------------------------------------------------------------------------------------------------------------------------------------------|
| <b>iv</b>  | Incomplete Outcome Data (Attrition Bias)        | Low risk     | Small number of dropouts only in one group (n=3 lost to follow-up)                                                                       |
| <b>v</b>   | Selective Reporting                             | Low risk     | The authors reported all the pre-specified outcomes.                                                                                     |
| <b>6</b>   | Vanderveken 2008                                | Risk of Bias | Support for judgement                                                                                                                    |
| <b>i</b>   | Randomisation (Selection Bias)                  | Low risk     | "Participants were randomly allocated (concealed Randomisation) to either treatment sequence A or B."                                    |
| <b>ii</b>  | Allocation Concealment (Selection Bias)         | Low risk     | "...allocated (concealed Randomisation) to either treatment sequence A or B."                                                            |
| <b>iii</b> | Blinding of outcome assessment (Detection Bias) | Low risk     | "Sleep recordings were scored manually in a standard fashion by a qualified sleep technician blinded to the subject's treatment status." |
| <b>iv</b>  | Incomplete Outcome Data (Attrition Bias)        | Low risk     | No dropouts reported                                                                                                                     |
| <b>v</b>   | Selective Reporting                             | Low risk     | The authors reported all the pre-specified outcomes.                                                                                     |
| <b>7</b>   | Wang 2014                                       | Risk of Bias | Support for judgement                                                                                                                    |
| <b>i</b>   | Randomisation (Selection Bias)                  | Low risk     | "Randomisation at the beginning of the study."                                                                                           |
| <b>ii</b>  | Allocation Concealment (Selection Bias)         | Unclear risk | No clear description                                                                                                                     |
| <b>iii</b> | Blinding of outcome assessment (Detection Bias) | Unclear risk | No clear description                                                                                                                     |
| <b>iv</b>  | Incomplete Outcome Data (Attrition Bias)        | Low risk     | Smaller no of dropouts (n=2 dropouts)                                                                                                    |
| <b>v</b>   | Selective Reporting                             | Low risk     | The authors reported all the pre-specified outcomes.                                                                                     |
| <b>8</b>   | Zhou 2012                                       | Risk of Bias | Support for judgement                                                                                                                    |
| <b>i</b>   | Randomisation (Selection Bias)                  | Low risk     | "The 16 patients enrolled were randomly divided into two groups..."                                                                      |
| <b>ii</b>  | Allocation Concealment (Selection Bias)         | Unclear risk | No clear description                                                                                                                     |
| <b>iii</b> | Blinding of outcome assessment (Detection Bias) | Unclear risk | No clear description                                                                                                                     |

|            |                                                 |              |                                                                                                                                                                                                  |
|------------|-------------------------------------------------|--------------|--------------------------------------------------------------------------------------------------------------------------------------------------------------------------------------------------|
| <b>iv</b>  | Incomplete Outcome Data (Attrition Bias)        | Low risk     | "All of the patients finished the treatment as expected..."                                                                                                                                      |
| <b>v</b>   | Selective Reporting                             | Low risk     | The authors reported all the pre-specified outcomes.                                                                                                                                             |
| <b>9</b>   | Johal 2017                                      | Risk of Bias | Support for judgement                                                                                                                                                                            |
| <b>i</b>   | Randomisation (Selection Bias)                  | Low risk     | "...random identification numbers were compiled from Altman's randomisation table to one of the two treatment groups, using a block randomisation method..."                                     |
| <b>ii</b>  | Allocation Concealment (Selection Bias)         | Low risk     | "Opaque envelopes to conceal the allocation were labelled with identification numbers only..."                                                                                                   |
| <b>iii</b> | Blinding of outcome assessment (Detection Bias) | Low risk     | "Data analysis, was undertaken blind to the intervention by a statistician with coded data, using SPSS."                                                                                         |
| <b>iv</b>  | Incomplete Outcome Data (Attrition Bias)        | Low risk     | Balanced dropouts from both the groups (Ready-made n= 6 and Custom-made n=4), "intention to treat analysis demonstrated that dropouts did not affect the validity of the current study results." |
| <b>v</b>   | Selective Reporting                             | Low risk     | The authors reported all the pre-specified outcomes.                                                                                                                                             |
| <b>10</b>  | Ghazal 2009                                     | Risk of Bias | Support for judgement                                                                                                                                                                            |
| <b>i</b>   | Randomisation (Selection Bias)                  | Low risk     | "Enrolled patients were Randomised according to a computer-generated Randomisation list."                                                                                                        |
| <b>ii</b>  | Allocation Concealment (Selection Bias)         | Unclear risk | Not described                                                                                                                                                                                    |
| <b>iii</b> | Blinding of outcome assessment (Detection Bias) | Unclear risk | No clear description                                                                                                                                                                             |
| <b>iv</b>  | Incomplete Outcome Data (Attrition Bias)        | Low risk     | Balanced number of withdrawals from both the groups at follow-up 1 and 2.                                                                                                                        |
| <b>v</b>   | Selective Reporting                             | Low risk     | The authors reported all the pre-specified outcomes.                                                                                                                                             |



Table S5. Risk of bias assessment for observational studies using the QUIPS tool

| Sr. no. | Study ID                     | Bias Domains        |                 |                               |                     |                   |                                    |
|---------|------------------------------|---------------------|-----------------|-------------------------------|---------------------|-------------------|------------------------------------|
|         |                              | Study Participation | Study Attrition | Prognostic Factor Measurement | Outcome Measurement | Study Confounding | Statistical Analysis and Reporting |
| 1       | <b>Attali 2006</b>           | Low                 | Low             | Moderate                      | Low                 | Moderate          | Low                                |
| 2       | <b>Carballo 2016</b>         | Moderate            | Low             | Moderate                      | Low                 | Moderate          | Low                                |
| 3       | <b>De Almeida 2005</b>       | Low                 | Low             | Moderate                      | Low                 | Moderate          | Low                                |
| 4       | <b>Izci 2005</b>             | Low                 | Low             | Moderate                      | Low                 | Low               | Low                                |
| 5       | <b>Makihara 2016</b>         | Low                 | Low             | Moderate                      | Low                 | Moderate          | Low                                |
| 6       | <b>McGown 2001</b>           | Low                 | Low             | Moderate                      | Low                 | Moderate          | Low                                |
| 7       | <b>Bates 2006</b>            | Low                 | Low             | Moderate                      | Low                 | Moderate          | Low                                |
| 8       | <b>Brette 2006</b>           | Low                 | Moderate        | Low                           | Low                 | Moderate          | Low                                |
| 9       | <b>Clark 2000</b>            | Low                 | Low             | Moderate                      | Low                 | Moderate          | Low                                |
| 10      | <b>Freidman 2012</b>         | Low                 | Low             | Moderate                      | Low                 | Moderate          | Low                                |
| 11      | <b>Dieltjens 2013</b>        | Low                 | Low             | Moderate                      | Low                 | Moderate          | Low                                |
| 12      | <b>Dieltjens 2015</b>        | Low                 | Low             | Low                           | Low                 | Low               | Low                                |
| 13      | <b>Haviv 2017</b>            | Low                 | Low             | Moderate                      | Low                 | Moderate          | Low                                |
| 14      | <b>Ingman 2013</b>           | Low                 | Low             | Low                           | Low                 | Moderate          | Low                                |
| 15      | <b>Nerfeldt 2016</b>         | Moderate            | Moderate        | Low                           | Low                 | Moderate          | Low                                |
| 16      | <b>Nishigawa 2017</b>        | Low                 | Moderate        | Moderate                      | Low                 | Moderate          | Low                                |
| 17      | <b>Prescinotto 2015</b>      | Moderate            | Low             | Low                           | Low                 | Moderate          | Low                                |
| 18      | <b>Rose 2002</b>             | Low                 | Low             | Moderate                      | Low                 | Moderate          | Low                                |
| 19      | <b>Saglam-Aydinatay 2018</b> | Moderate            | Low             | Low                           | Low                 | Moderate          | Low                                |
| 20      | <b>Tsuda 2004</b>            | Low                 | Low             | Low                           | Low                 | Moderate          | Low                                |
| 21      | <b>Vecchierini 2016</b>      | Low                 | Low             | Low                           | Low                 | Moderate          | Low                                |
